# Supplementary material
Source: PubMed Central journal article supplement (PMC3918885)

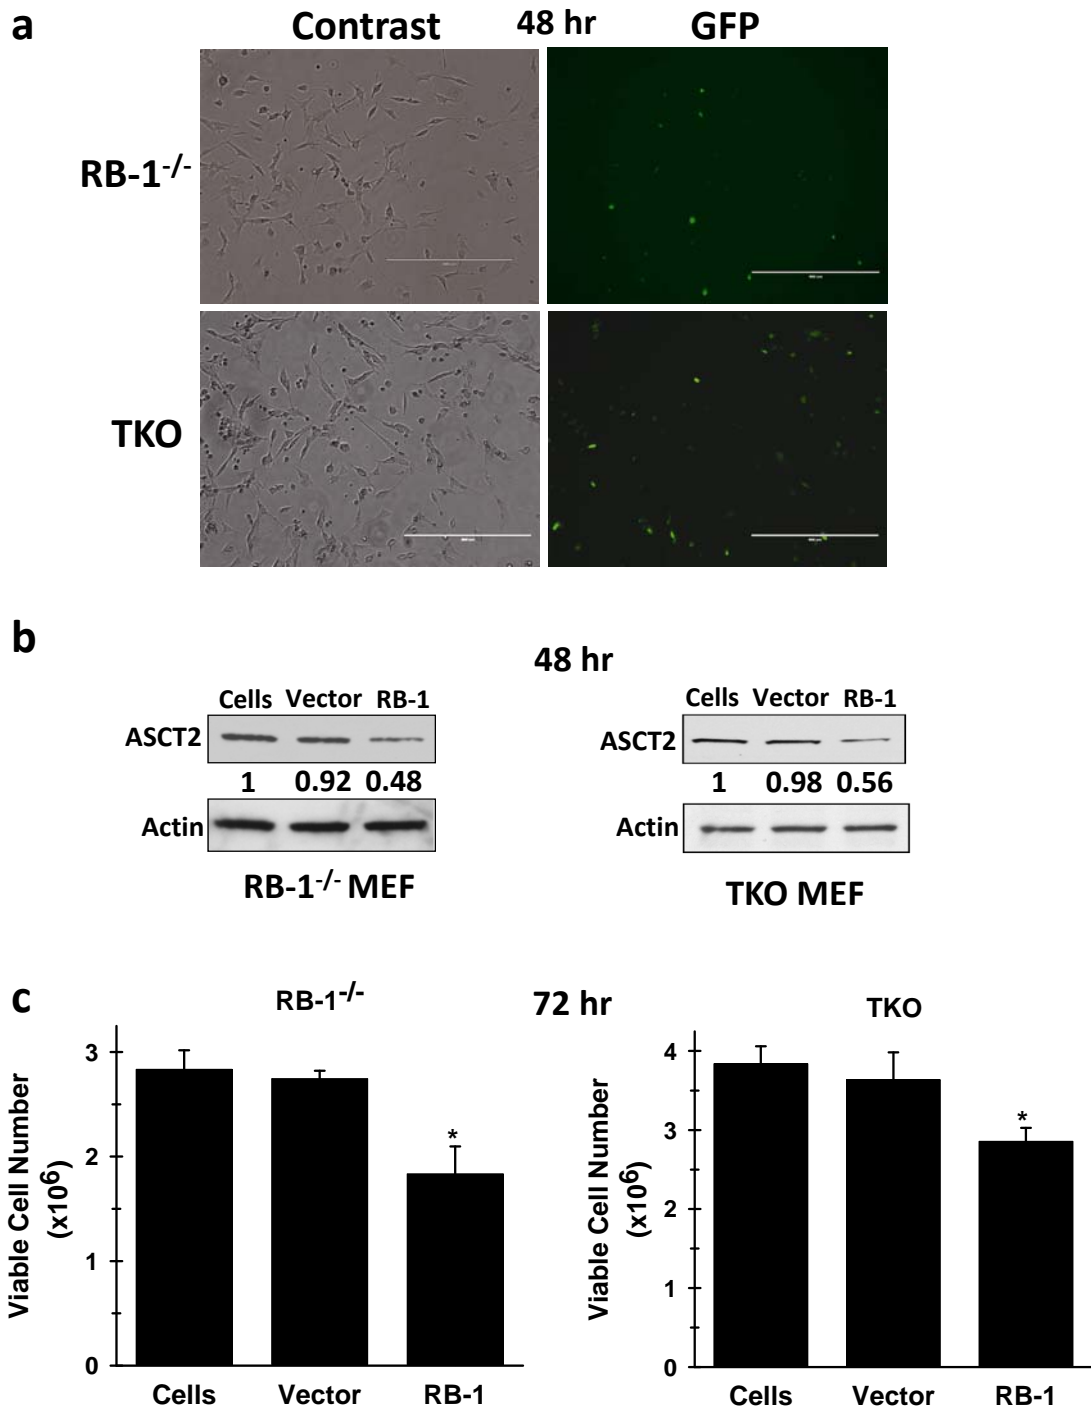

Reynolds, *et al.*  
 Supplementary  
 Figure 1

Supplement: NIHMS550043-supplement-2.pdf [file NIHMS550043-supplement-2.pdf]

**a**

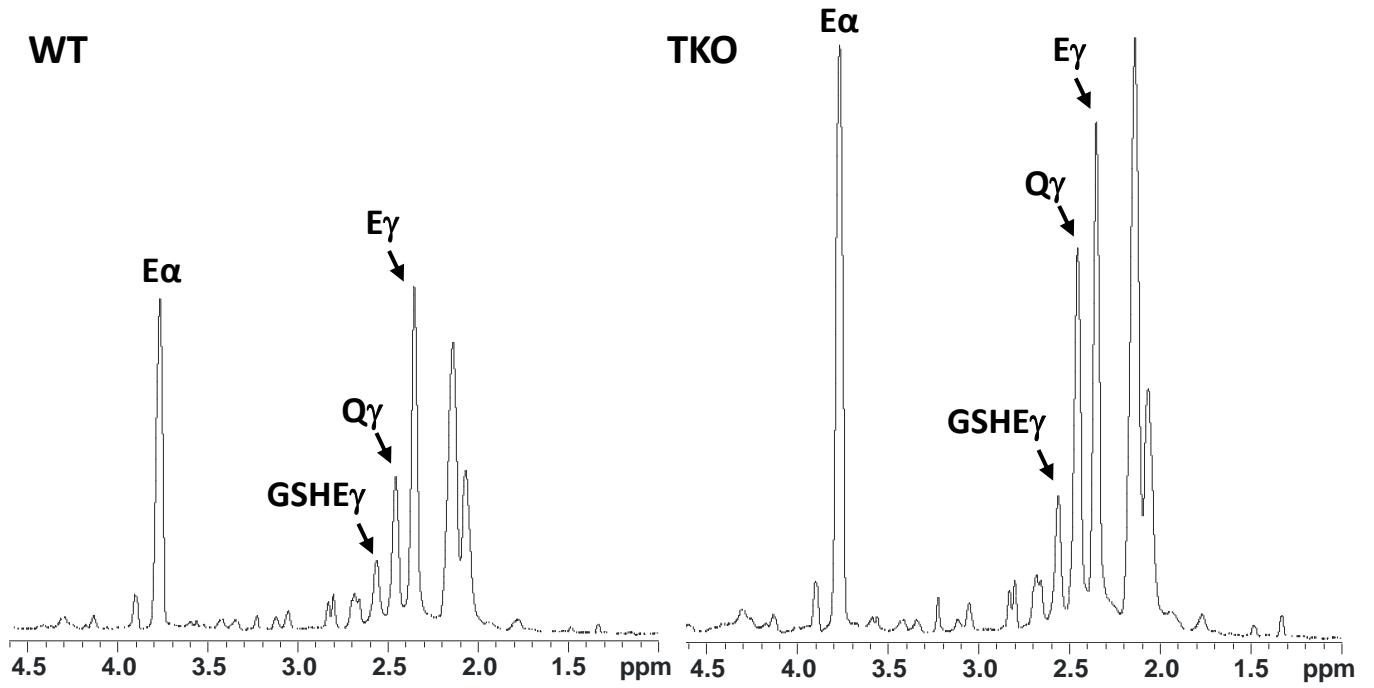

**b**

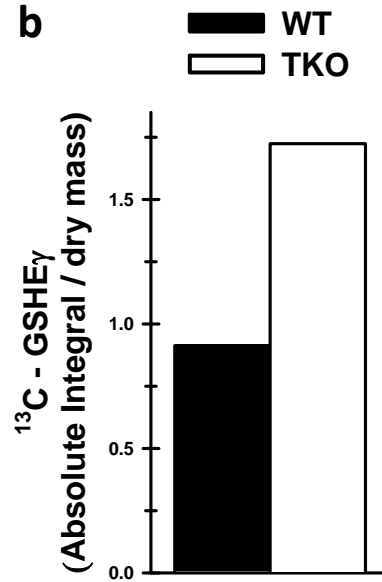

Reynolds, *et al.*  
Supplementary  
Figure 2

Supplement: NIHMS550043-supplement-3.pdf [file NIHMS550043-supplement-3.pdf]

# WT

**a**

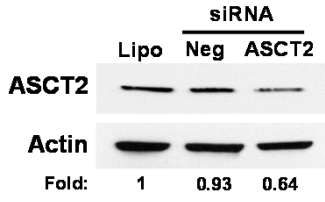

**b**

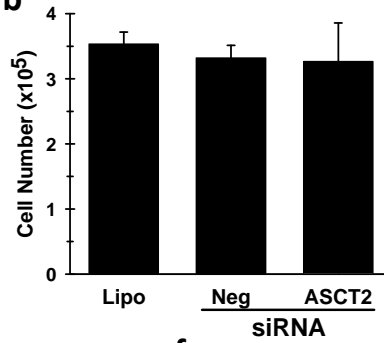

**c**

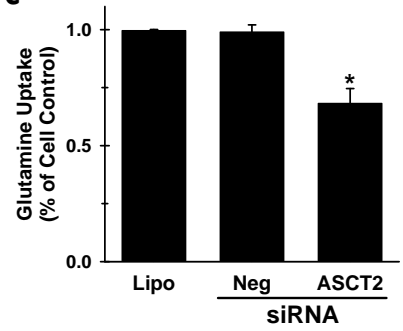

**d**

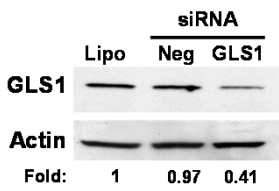

**e**

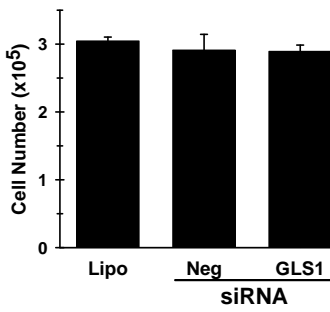

**f**

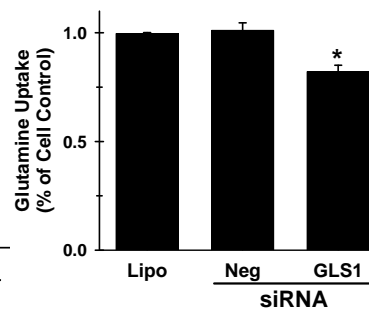

**g**

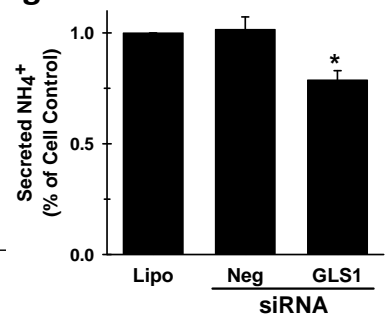

# TKO

**h**

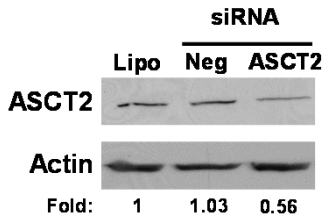

**i**

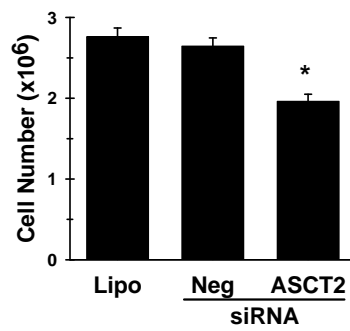

**j**

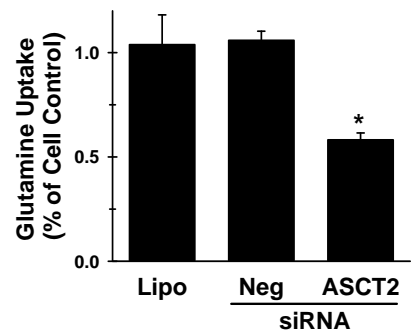

**k**

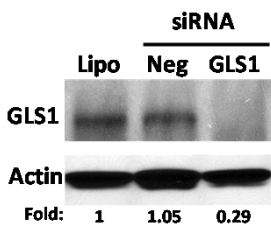

**l**

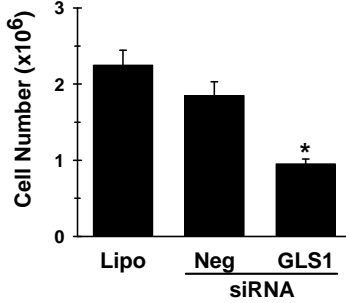

**m**

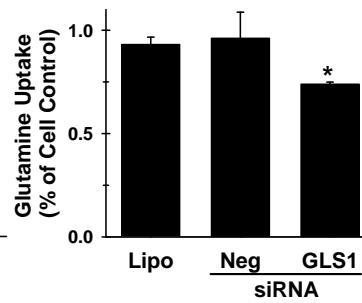

**n**

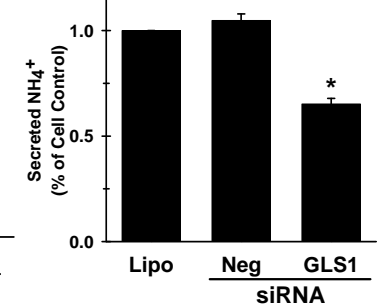

Reynolds, *et al.*  
Supplementary  
Figure 3

Supplement: NIHMS550043-supplement-4.pdf [file NIHMS550043-supplement-4.pdf]
